# Supplementary material for: Susceptibility to Ebbinghaus and Müller-Lyer illusions in autistic children: a comparison of three different methods
Source: PubMed Central journal article supplement (PMC5364638; doi:10.1186/s13229-017-0127-y), 2017-03-23
Supplement: 13229_2017_127_MOESM1_ESM.pdf [file 13229_2017_127_MOESM1_ESM.pdf]

### Additional File 1. Results with no replacement of outliers.

#### Experiment 1:

|                      | Autistic<br>M(SD) | Typically<br>developing<br>M(SD) | Results of independent-samples t-test                                 |
|----------------------|-------------------|----------------------------------|-----------------------------------------------------------------------|
| Ebbinghaus:<br>Bias  | 39.62 (51.02)     | 54.44 (60.22)                    | $t(60) = 1.04, p = .30$ (bootstrapped CI [-44.89, 14.51], $p = .34$ ) |
| Müller-Lyer:<br>Bias | 77.70 (62.89)     | 70.58 (158.22)                   | $t(78) = .25, p = .81$ (bootstrapped CI [-43.20, 62.11], $p = .80$ ). |

#### Experiment 3:

|                              | Autistic<br>M(SD) | Typically<br>developing<br>M(SD) | Results of independent-samples t-test |
|------------------------------|-------------------|----------------------------------|---------------------------------------|
| Müller-Lyer:<br>Context-free | 2.80 (6.44)       | -.39 (3.75)                      | $t(80) = 2.80, p = .006, d = 0.61$    |
