# Supplementary material for: Susceptibility to Ebbinghaus and Müller-Lyer illusions in autistic children: a comparison of three different methods
Source: PubMed Central journal article supplement (PMC5364638; doi:10.1186/s13229-017-0127-y), 2017-03-23

## Additional File 2. Results of robustness checks for Bayesian analyses.

Results of robustness checks for Bayesian independent samples t-tests to assess group differences in bias in Ebbinghaus (A) and Müller-Lyer (B) tasks in Experiments 1 and 3, implemented using JASP Statistical Software (JASP Team, 2016).

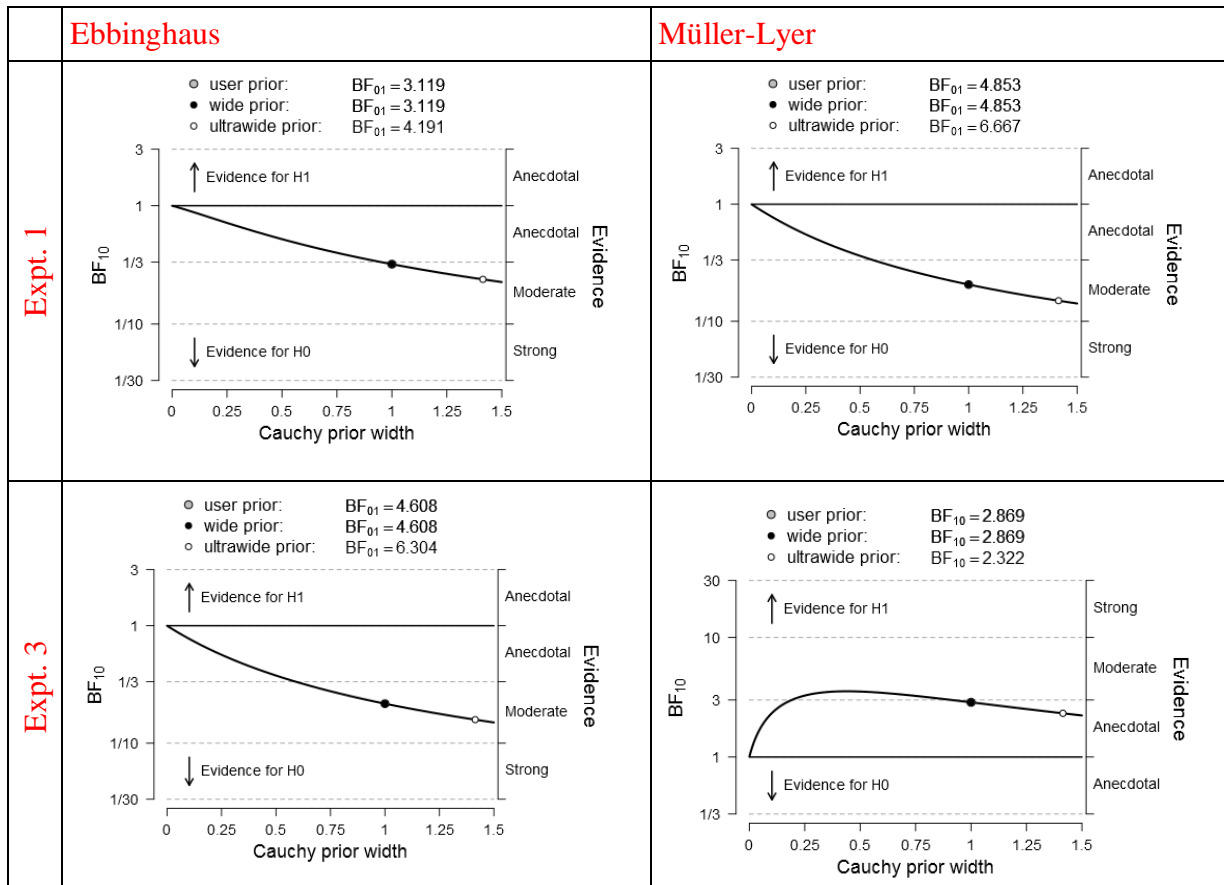

Results of robustness check for Bayesian contingency test to assess independence between group membership and responses in the Ebbinghaus (A) and Müller-Lyer (B) task in Experiment 2. The Bayes Factor ( $BF_{10}$ ) is plotted at a range of different prior concentrations.

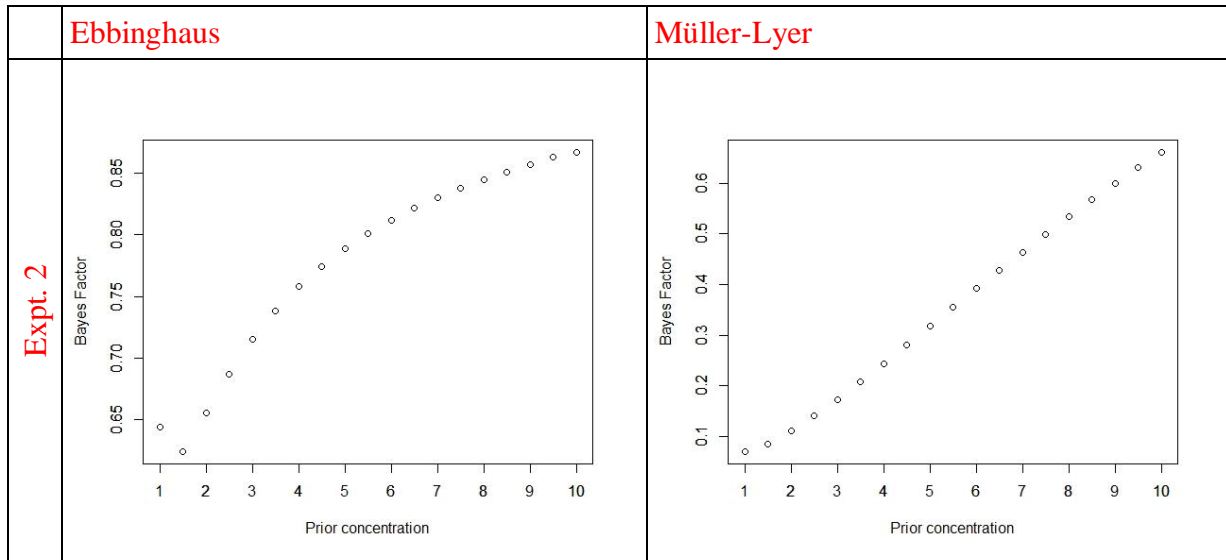

Supplement: 13229_2017_127_MOESM2_ESM.pdf [file 13229_2017_127_MOESM2_ESM.pdf]
